# Supplementary material for: Plasmid Curing and Exchange Using a Novel Counter-Selectable Marker Based on Unnatural Amino Acid Incorporation at a Sense Codon
Source: MDPI journal article supplement (doi:10.3390/ijms222111482), 2021-10-25
Supplement: s1 [file s1]

## **Supporting Information**

### **Plasmid curing and exchange using a novel counter-selectable marker based on unnatural amino acid incorporation at a sense codon**

Yusuke Kato

Institute of Agrobiological Sciences, National Agriculture and Food Research Organization (NARO), Oowashi 1 - 2, Tsukuba, Ibaraki 305 - 8634, Japan;  
kato@affrc.go.jp

**Figure S1.**

Nucleotide sequence of the target plasmid used in the plasmid curing experiment shown in Figure 1.

1 ttggtagctc agagaacctt cgaaaaaccc ccctgcaagg cggttttttc gttttcagag  
61 caagagatta cgcgcagacc aaaacgatct caagaagatc atcttattaa tcagataaaa  
121 tatttctaga ttctagtcca atttatctct tcaaatgtag cacctgaagt cagccccata  
181 cgatataagt tgtaattctc atgtttgaca gcattatcat cgataagctt taatgcggta  
241 gtttatcaca gttaaattgc taacgcagtc aggcaccgtg tatgaaatct aacaatgcgc  
301 tcctgcctcat cctcggcacc gtcaccctgg atgctgtagg cataggcttg gttatgcggg  
361 tactgcgggg cctcttgcgg gatctgtcc attccgacag catcgccagt cactatggcg  
421 tgctgctagc gctatatgca ttgatgcaat ttctatgcgc acccgttctc ggagcactgt  
481 ccgaccgctt tggcgcggc ccagtcctgc tcgcttcgct acttggagcc actatcgact  
541 acgcgatcat ggcgaccaca ccgctcctgt gcctcctcta cgcgggacgc atcgtggccg  
601 gcctcaccgg cgcacaggt gcggttgctg gcgcctatat cgcgcacatc accgatgggg  
661 aagatcgggc tcgccacttc gggctcatga gcgcttgctt cggcgtgggt atggtggcag  
721 gcccgtggc cgggggactg ttgggcgcca tctccttgca tgcaccattc cttgcggcgg  
781 cgggtgctca cggcctcaac ctactactgg gctgcttcct aatgcaggag tcgcataagg  
841 gagagcgtcg aagctttaat gcggtagttt atcacagtta aattgctaac gcagtcaggc  
901 accgtgtatg aaatctaaca atgcgctcat cgtcatcctc ggcaccgtca ccctggatgc  
961 tgtaggcata ggcttggtta tgcgggtact gccgggcctc ttgcgggata tcgtccattc  
1021 cgacagcatc gccagtcact atggcgtgct gctagcatcg acgagtctgg ctttgacatt  
1081 cgactagaag tggacgggtg cgtgaagggt aacaacattg gcgaaatcgc tgcggcgggc  
1141 gcggatatgt tcgtgcggg ttccggcaatc ttccaccagc cagactacaa aaaagtcatt  
1201 gatgaaatgc gcagtgaact ggcaaaggta agtcatgaat aagtttgaag atattcggg  
1261 cgtgcctttt gatottgatg gtacgctggt cgacagtgc cctggtcttg ctgctgoggt  
1321 agatatggcg ctgtatgcgc tggagttgcc cgtcgcagggt gaagaacgcg ttattacctg  
1381 gatttgtaac ggccagatg ttctgatgga gcgcgcattg acctgggcgc gtcaggaacg  
1441 tgcgactcag cgtaaaacaa tgggtaaacc gccggttgat gacgacattc cggcagaaga  
1501 acaggtacgt attctgcgta aactgttcga tcgctactat ggccagggtg ccgaagaggg  
1561 gacgtttttt ttccgcacg ttgcggatac gttgggcgcg ttgcaggcta aaggcctgcc  
1621 gctaggcctg gtcaccaaca aaccgacgcc gttcgtcgcg ccgctgctcg aagccttaga  
1681 tatcgccaaa tacttcagcg cgggtgattg tggtgatgat gtgcaaaaca aaaaaccgca  
1741 tccggaccgc ctgttactgg tggctgagcg gatgggaatt gcccacaaac agatgctgtt  
1801 tgcggcgac tcacgcaatg atattcagcg ggcaaaagcg gcaggttgcc catcagttgg  
1861 cttaacctac ggatataact acggcgaggc tatcgatctc agccagcctg atgtaattta  
1921 tcagtctata aatgaccttc tgccgcatt agggcttcg catagcgaaa atcaggaatc  
1981 gacatATGGA TAAAAACCA CTAAACACTC TGATATCTGC AACGGGCTC TGGATGTCCA  
2041 GGACCGGAAC AATTCATAAA ATAAACACC ACGAAGTCTC TCGAAGCAA ATCTATATTG

2101 AAATGGCATG CGGAGACCAC CTTGTTGTAA ACA<sup>A</sup>CTCCAG GAGCAGCAGG ACTGCAAGAG  
2161 CGGTCAAGCA CCACAAATAC AGGAAGACCT GCAAACGCTG CAGGGTTTCG GATGAGGATC  
2221 TCAATAAGTT CCTCACAAAG GCAAACGAAG ACCAGACAAG CGTAAAAGTC AAGGTCGTTT  
2281 CTGCCCCTAC CAGAACGAAA AAGGCAATGC CAAAATCCGT TGCAGAGGCC CCGAAACCTC  
2341 TTGAGAATAC AGAAGCGGCA CAGGCTCAAC CTTCTGGATC TAAATTTTCA CCTGCGATAC  
2401 CGGTTTCCAC CCAAGAGTCA GTTCTGTCC CGGCATCTGT TTCAACATCA ATATCAAGCA  
2461 TTTCTACAGG AGCAACTGCA TCCGCACTGG TAAAAGGGAA TACGAACCCC ATTACATCCA  
2521 TGTCTGCCCC TGTTCAGGCA AGTGCCCCCG CACTTACGAA GAGCCAGACT GACAGGCTTG  
2581 AAGTCCTGTT AAACCCAAAA GATGAGATT CCCTGAATTC CGGCAAGCCT TTCAGGGAGC  
2641 TTGAGTCCGA ATTGCTCTCT CGCAGAAAAA AAGACCTGCA GCAGATCTAC GCGGAAGAAA  
2701 GGGAGAATTA TCTGGGAAA CTCGAGCGTG AAATTACCAG GTTCTTTGTG GACAGGGGTT  
2761 TTCTGGAAAT AAAATCCCCG ATCCTGATCC CTCTGAGTA TATCGAAAGG ATGGGCATTG  
2821 ATAATGATAC CGAACTTTCA AAACAGATCT TCAGGGTTGA CAAGAACTTC TGCCTGAGAC  
2881 CCATGCTTGC TCCAAACCTT GCCAACTACC TCGCAAGCT TGACAGGGCC CTGCCTGATC  
2941 CAATAAAAAT TTTTGAAATA GGCCCATGCT ACAGAAAAGA GTCCGACGGC AAAGAACACC  
3001 TCGAAGAGTT TACCATGCTG AACTTCTGCC AGATGGGATC GGGATGCACA CGGGAAAATC  
3061 TTGAAAGCAT AATTACAGAC TTCCTGAACC ACCTGGGAAT TGATTTCAAG ATCGTAGGCG  
3121 ATTCTGCAAT GGTCTTTGGG GATACCTTG ATGTAATGCA CGGAGACCTG GAA<sup>T</sup>CTTCT  
3181 CTGCAGTAGT CGGACCCATA CCGCTTGACC GGAATGGGG TATTGATAAA CCCTGGATAG  
3241 GGGCAGGTTT CGGGCTCGAA CGCCTTCTCA AGGTAAACA CGACTTTAAA AATATCAAGA  
3301 GAGCTGCAAG GTCCGGGTCT TACTATAACG GGATTTCTAC CAACCTGTAA ggatctgcat  
3361 cgcaggatgc tgctggctac cctgtggaac acctacatct gtattaacga agcgctggca  
3421 ttgacctga gtgatttttc tctggtcccg ccgcatccat accgccagtt gtttaccctc  
3481 acaacgttcc agtaaccggg catgttcac atcagtaacc cgtatcgtga goatcctctc  
3541 tcgtttcatc ggtatcatta ccccatgaa cagaaatccc ctttacacgg aggcacagtt  
3601 gaccaaacag gaaaaaacg cccttaacat ggcccgcttt atcagaagcc agacattaac  
3661 gcttctggag aaactcaacg agctggacgc ggatgaacag gcagacatct gtgaatcgct  
3721 tcacgaccac gcatcaaaaa aaatccttag ctttcgctaa ggatctgcag TGGCGGAAAC  
3781 CCCGGGAATC TAACCCGGCT GAACGGATTG GCAGTCCATT CGATCTACAT GATCAGGTTT  
3841 CCGGATCCGT TACAAGTATT ACACAAAGTT TTTTATGTTG AGAATATTTT TTTGA<sup>T</sup>gggg  
3901 cgccacttat ttttgatcgt tcgctcaaag aagcggcgcc gtcgaccgat gcccttgaga  
3961 gccttcaacc cagtcagctc cttccggtgg gcgcggggca tgactatcgt cgccgcactt  
4021 atgactgtct tctttatcat gcaactcgta ggacaggtgc cggcagcgct ctgggtcatt  
4081 ttccggcagg accgctttcg ctggagcgcg acgatgatcg gcctgtcgct tgcggtattc  
4141 ggaatcttgc acgcctcgc tcaagccttc gtcactggtc ccgccacca acgtttcggc  
4201 gagaagcagg ccattatcgc cggcatggcg gccgaggtct gcctcgtgaa gaaggtgttg

4261 ctgactcata ccaggcctga atcgcccat catccagcca gaaagtgagg gagccacggt  
 4321 tgatgagagc tttgtttag gtggaccagt tggatgtttt gaacttttgc tttgccacgg  
 4381 aacggctctgc gttgtcggga agatgcgtga tctgacctt caactcagTT ACGCCCGCC  
 4441 CTGCCACTCA TCGCAGTACT GTTGTAAATC ATTAAGCATT CTGCCGACAT GGAAGCCATC  
 4501 ACAAACGGCA TGATGAACCT GAATCGCCAG CGGCATCAGC ACCTTGTCGC CTTGCGTATA  
 4561 ATATTTGCCC ATGGTGAAAA CGGGGGCGAA GAAGTTGTCC ATATTGGCCA CGTTTAAATC  
 4621 AAAACTGGTG AAATCAGCC AGGGATTGGC TGAGACGAAA AACATATTCT CAATAAACCC  
 4681 TTTAGGGAAA TAGGCCAGGT TTTACCGTA ACACGCCACA TCTTGCGAAT ATATGTGTAG  
 4741 AAATGCCGG AAATCGTCGT GGTATTCACT CCAGAGCGAT GAAAACGTTT CAGTTTGCTC  
 4801 ATGGAAAACG GTGTAACAAG GGTGAACACT ATCCCATATC ACCAGCTCAC CGTCTTTCAT  
 4861 TGCCATACGG AATTCGGAT GAGCATTAT CAGGCGGGCA AGAATGTGAA TAAAGGCCGG  
 4921 ATAAACTTG TGCTTATTT TCTTACGGT CTTTAAAAAG GCCGTAATAT CCAGCTGAAC  
 4981 GGTCTGGTTA TAGGTACATT GAGCAACTGA CTGAAATGCC TCAAATGTT CTTTACGATG  
 5041 CCATTGGGAT ATATCAACGG TGGTATATCC AGTGATTTT TTCTCCATtt tagcttccct  
 5101 agctcctgaa aatctcgata actcaaaaaa tacgcccggg agtgatotta ttccattatg  
 5161 gtgaaagttg gaacctotta cgtgcgcatc aacgtotcat ttccgcaaa agttggccca  
 5221 gggcttcccg gtatcaacag ggacaccagg atttatttat totgcgaagt gatcttccgt  
 5281 cacaggatatt tattcggcgc aaagtgcgtc gggatgatgt gccaaacttac tgatttagtg  
 5341 tatgatgggt tttttgaggt gctccagtgg cttctgtttc tatcagotgt cctcctgtt  
 5401 cagctactga cgggggtgtg cgtaacggca aaagcaccgc cggacatcag cgctagcggg  
 5461 gtgtatactg gcttactatg ttggcactga tgagggtgtc agtgaagtgc ttcattgtgg  
 5521 aggagaaaaa aggtgcacc ggtgcgtcag cagaatatgt gatacaggat atattccgct  
 5581 tcctcgctca ctgactcgtc acgtcggtc gttcgactgc ggcgagcgga aatggcttac  
 5641 gaacggggcg gagatttcct ggaagatgcc aggaagatac ttaacaggga agtgagaggg  
 5701 ccgcggaaca gccgtttttc cataggctcc gccccctga caagcatcac gaaatctgac  
 5761 gctcaaatca gtggtggcga aaccgcacag gactataaag ataccaggcg tttcccccgtg  
 5821 gcggctccct cgtgcgctct cctgttcctg cctttcgggt tacgggtgtc attccgctgt  
 5881 tatggccgcg tttgtotcat tccacgcctg acactcagtt ccgggtaggc agttcgctcc  
 5941 aagctggact gtatgcacga acccccgtt cagtccgacc gctgcgctt atccgtaac  
 6001 tatcgtcttg agtccaaccc ggaaagacat gcaaaagcac cactggcagc agccactggt  
 6061 aattgattta gaggagttag tcttgaagtc atgcgccggt taaggctaaa ctgaaaggac  
 6121 aagttttggt gactgcgctc ctccaagcca gttacctcgg ttcaaagag

Comments

ZKRS ORF: 1986-3350 (highlighted in pink)

tRNA<sup>pyl</sup><sub>600</sub>: 3771–3896 (complementary strand; highlighted in deep green. The anticodon region is highlighted in yellow-green)

*cat* ORF: 4429–5088 (complementary strand; highlighted in light blue)

p15A origin: 5450–192 (highlighted in gray)

**Figure S2.**

Nucleotide sequence of the target plasmid used in the plasmid exchange experiment shown in Figure 2. The positions and sequences of the PCR primers specific for the target plasmids (ZKRS-s and ZKRS-as) used in Figure 2e are also shown.

1 ttggtagctc agagaacctt cgaaaaaccg ccctgcaagg cggttttttc gttttcagag  
61 caagagatta cgcgagacc aaaacgatct caagaagatc atcttattaa tcagataaaa  
121 tatttctaga ttctagtca atttatctct tcaaatgtag cacctgaagt cagccccata  
181 cgatataagt tgtaattctc atgtttgaca gcattatcat cgataagctt taatgcggta  
241 gtttatcaca gttaaattgc taacgcagtc aggcaccgtg tatgaaatct aacaatgcgc  
301 tcctgctcat cctcggcacc gtcaccctgg atgctgtagg cataggcttg gttatgcggg  
361 tactgcgggg cctcttgcgg gatctgctcc attccgacag catcgccagt cactatggcg  
421 tgctgctagc gctatatgcg ttgatgcaat ttctatgcgc acccgttctc ggagcactgt  
481 ccgaccgctt tggcgcgcgc ccagtcctgc tcgcttcgct acttggagcc actatcgact  
541 acgcgatcat ggcgaccaca ccgctcctgt gcatcctcta cgcgggacgc atcgtggccg  
601 gcatcaccgg cgccacaggt gcggttgctg gcgcctatat cgcgacatc accgatgggg  
661 aagatcgggc tcgccacttc gggctcatga gcgcttgctt cggcgtgggt atggtggcag  
721 gcccgtggc cgggggactg ttgggcgcca tctccttgca tgcaccattc cttgcggcgg  
781 cgggtgctca cggcctcaac ctactactgg gctgcttcct aatgcaggag tcgcataagg  
841 gagagcgtcg aagctttaat gcggtagttt atcacagtta aattgctaac gcagtcaggc  
901 accgtgtatg aaatctaaca atgcgctcat cgtcatcctc ggcaccgtca ccctggatgc  
961 tgtaggcata ggcttggtta tgccggctact gccgggcctc ttgcgggata tcgtccattc  
1021 cgacagcatc gccagtcact atggcgtgct gctagcatcg acgagtctgg ctttgacatt  
1081 cgactagaag tggacgggtg cgtgaagggt aacaacattg gcgaaatcgc tcgcggcggc  
1141 gcggatatgt tcgtgcggg ttccggcaatc ttccaccagc cagactacaa aaaagtcatt  
1201 gatgaaatgc gcagtgaact ggcaaaggta agtcatgaat aagtttgaag atattcggg  
1261 cgtgcctttt gatottgatg gtacgctggt cgacagtgc cctggtcttg ctgctgoggt  
1321 agatatggcg ctgtatgcgc tggagttgcc cgtcgcagggt gaagaacgcg ttattacctg  
1381 gatttgtaac ggcgagatg ttctgatgga gcgcgcattg acctgggcgc gtcaggaacg  
1441 tgcgactcag cgtaaaacaa tgggtaaacc gcccgttgat gacgacattc cggcagaaga  
1501 acaggtacgt attctgcgta aactgttcga tcgctactat ggcgagggtg ccgaagaggg  
1561 gacgtttttt ttccgcacg ttgcgatac gttgggcgcg ttgcaggcta aaggcctgcc  
1621 gctaggcctg gtcaccaaca aaccgacgcc gttcgtcgcg ccgctgctcg aagccttaga  
1681 tatcgccaaa tacttcagcg cgggtattgg tggatgatg gtgcaaaaca aaaaaccgca  
1741 tccggaccgc ctgttactgg tggctgagcg gatgggaatt gcccacaaac agatgctgtt  
1801 tgcggcgac tcacgcaatg atattcagcg ggcaaaagcg gcaggttgcc catcagttgg  
1861 cttaacctac ggatataact acggcgaggc tatcgatctc agccagcctg atgtaattta  
1921 tcagtctata aatgaccttc tgccgcatt agggcttcg catagcgaaa atcaggaatc  
1981 gacatATGGA TAAAAACCA CTAAACACTC TGATATCTGC AACGGGCTC TGGATGTCCA  
2041 GGACCGGAAC AATTCATAAA ATAAACACC ACGAAGTCTC TCGAAGCAA ATCTATATTG



2101 AAATGGCATG CCGAGACCAC CTGTTGTAA ACAACTCCAG GAGCAGCAGG ACTGCAAGAG  
2161 CGCTCAAGCA CCACAAATAC AGGAAGACCT GCAAACGCTG CAGGGTTTCG GATGAGGATC  
2221 TCAATAAGTT CCTCACAAAG GCAAACGAAG ACCAGACAAG CGTAAAAGTC AAGGTCGTTT  
2281 CTGCCCCTAC CAGAACGAAA AAGGCAATGC CAAAATCCGT TGCAGAGGCC CCGAAACCTC  
2341 TTGAGAATAC AGAAGCGGCA CAGGCTCAAC CTTCTGGATC TAAATTTTCA CCTGCGATAC  
2401 CGGTTTCCAC CCAAGAGTCA GTTCTGTCC CGGCATCTGT TTCAACATCA ATATCAAGCA  
2461 TTTCTACAGG AGCAACTGCA TCCGCACTGG TAAAAGGGAA TACGAACCCC ATTACATCCA  
2521 TGTCTGCCCC TGTTCAGGCA AGTGCCCCCG CACTTACGAA GAGCCAGACT GACAGGCTTG  
2581 AAGTCCTGTT AAACCCAAAA GATGAGATT CCCTGAATTC CGGCAAGCCT TTCAGGGAGC  
2641 TTGAGTCCGA ATTGCTCTCT CGCAGAAAAA AAGACCTGCA GCAGATCTAC GCGGAAGAAA  
2701 GGGAGAATTA TCTGGGAAA CTCGAGCGTG AAATTACCAG GTTCTTTGTG GACAGGGGTT  
2761 TTCTGGAAAT AAAATCCCCG ATCCTGATCC CTCTGAGTA TATCGAAAGG ATGGGCATTG  
2821 ATAATGATAC CGAACTTTCA AAACAGATCT TCAGGGTTGA CAAGAACTTC TGCCTGAGAC  
2881 CCATGCTTGC TCCAAACCTT GCCAACTACC TCGCAAGCT TGACAGGGCC CTGCCTGATC  
2941 CAATAAAAAT TTTTGAAATA GGCCCATGCT ACAGAAAAGA GTCCGACGGC AAAGAACACC  
3001 TCGAAGAGTT TACCATGCTG AACTTCTGCC AGATGGGATC GGGATGCACA CGGGAAAATC  
3061 TTGAAAGCAT AATTACAGAC TTCCTGAACC ACCTGGGAAT TGATTTCAG ATCGTAGGCG  
3121 ATTCTGCAT GGTCTTTGGG GATACCTTG ATGTAATGCA CGGAGACCTG GAACCTTCTC  
3181 CTGCAGTAGT CCGAACCATA CCGCTTGACC GGAATGGGG TATTGATAAA CCCTGGATAG  
3241 GGGCAGGTTT CGGGCTCGAA CGCCTTCTCA AGGTAAACA CGACTTTAAA AATATCAAGA  
3301 GAGCTGCAAG GTCCGGGTCT TACTATAACG GGATTTCTAC CAACCTGTAA ggatctgcat  
3361 cgcaggatgc tgctggctac cctgtggaac acctacatct gtattaacga agcgctggca  
3421 ttgacctga gtgatttttc tctggtcccg ccgcatccat accgccagtt gtttacctc  
3481 acaacgttcc agtaaccggg catgttcac atcagtaacc cgtatcgtga goatcctctc  
3541 tcgtttcatc ggtatcatta ccccatgaa cagaaatccc cttacacgg aggcacagtt  
3601 gaccaaacag gaaaaaacg cccttaacat ggcccgcttt atcagaagcc agacattaac  
3661 gcttctggag aaactcaacg agctggacgc ggatgaacag gcagacatct gtgaatcgct  
3721 tcacgaccac gcatcaaaaa aaatccttag ctttcgctaa ggatctgcag TGGCGGAAA  
3781 CCCGGGAATC TAACCCGGCT GAACGGATTG CGAGTCCATT CGATCTACAT GATCAGGTTT  
3841 CCGGATCCGT TACAAGTATT ACACAAAGTT TTTTATGTTG AGAATATTTT TTTGA ggac  
3901 ccgtatcgtg agcatcctct ctcgtttcat cggatcatt acccccatga acagaaatcc  
3961 ccottacacg gaggcacag tgaccaaaca ggaaaaaac gcccttaaca tggcccgctt  
4021 tatcagaagc cagacattaa cgcttctgga gaaactcaac gagctggacg cggatgaaca  
4081 ggcagacatc tgtgaatcgc ttcaogacca cgcacaaaa aaaatcctta gctttcgcta  
4141 aggatctgca gTGGCGGAAA CCCCAGGAAT CTAACCCGGC TGAACGGATT ACCAGTCCAT  
4201 TCGATCTACA TGATCAGGTT TCCGGATCCG TTACAAGTAT TACACAAAGT TTTTATGTT

4261 GAGAATATTT TTTTGATGGG GCGCCACTTA TTTTGA<sup>T</sup>cg ttcgctcaaa gaagcggcgc  
4321 cgtcgaccga tgcccttgag agccttcaac ccagtcagct ccttcgggtg ggcgcggggc  
4381 atgactatcg tcgccgcact tatgactgtc ttctttatca tgcaactcgt aggacagggtg  
4441 ccggcagcgc tctgggtcat tttcggcgag gaccgctttc gctggagcgc gacgatgatc  
4501 ggccgtgtcg ttgcggtatt cggaatcttg caccgcctcg ctcaagcctt cgtcactggt  
4561 cccgccacca aacgtttcgg cgagaagcag gccattatcg ccggcatggc ggccgaggtc  
4621 tgcctcgtga agaaggtgtt gctgactcat accaggcctg aatcgcccca tcatccagcc  
4681 agaaagttag ggagccacgg ttgatgagag ctttgttgta ggtggaccag ttggtgattt  
4741 tgaacttttg ctttgccacg gaacggtctg cgttgtcggg aagatgcgtg atctgatcct  
4801 tcaactcag<sup>T</sup> TACGCCCGC CCTGCCACTC ATCGCAGTAC TGTGTAA<sup>T</sup>TT CATTAAGCAT<sup>T</sup>  
4861 TCTGCCGACA TGGAAGCCAT CACAAACGGC ATGATGAACC TGAATCGCCA GCGGCATCAG<sup>T</sup>  
4921 CACCTTGTCT CCTTGCGTAT AATATTTGCC CATGGTGAAA ACGGGGGCGA AGAAGTTGTC<sup>T</sup>  
4981 CATATTGGCC ACGTTTAAAT CAAAAC<sup>T</sup>TGGT GAAACTCACC CAGGGATTGG CTGAGACGAA<sup>T</sup>  
5041 AAACATATTC TCAATAAAC<sup>C</sup> CTTTAGGGAA ATAGGCCAGG TTTTCACCGT AACACGCCAC<sup>T</sup>  
5101 ATCTTGCGAA TATATGTGTA GAAACTGCCG GAAATCGTCG TGGTATTCAC TCCAGAGCGA<sup>T</sup>  
5161 TGA<sup>A</sup>AACGTT TCAGTTTGCT CATGGAA<sup>A</sup>AC GGTGTAACAA GGGTGAACAC TATCCCATAT<sup>T</sup>  
5221 CACCAGCTCA CCGTCTTTCA TTGCCATACG GAATTCCGGA TGAGCATTCA TCAGGCCGGC<sup>T</sup>  
5281 AAGAATGTGA ATAAAGGCCG GATAAACTT GTGCTTATTT TTCTTTACGG TCTTTAAAA<sup>A</sup>  
5341 GGCCGTAATA TCCAGCTGAA CGGTCTGGTT ATAGGTACAT TGAGCAACTG ACTGAAATGC<sup>T</sup>  
5401 CTCAAAATGT TCTTTACGAT GCCATTGGGA TATATCAACG GTGGTATATC CAGTGATTTT<sup>T</sup>  
5461 TTTCTCCAT<sup>t</sup> ttagcttcct tagctcctga aaatctcgat aactcaaaaa atacgcccg  
5521 tagtgatcct atttcattat ggtgaaagt ggaacctctt acgtgccgat caacgtotca  
5581 ttttcgcaa aagtggccc agggcttccc ggtatcaaca gggacaccag gatttattta  
5641 ttctgcgaag tgatcttcg tcacaggat ttattcggcg caaagtgcgt cgggtgatgc  
5701 tgccaactta ctgatttagt gtatgatggt gttttgagg tgctccagt gcttctgttt  
5761 ctatcagctg tccctcctgt tcagctactg acggggtggt gcgtaacggc aaaagcaccg  
5821 ccggacatca gcgctagcgg agtgatact ggcttactat gttggcactg atgagggtgt  
5881 cagtgaagtg cttcatgtgg caggagaaaa aaggctgcac cggtcgctca gcagaatatg  
5941 tgatacagga tatattccgc ttctcgcctc actgaactgc tacgctcgtt cgttcgactg  
6001 cggcgagcgg aaatggctta cgaacggggc ggagatttcc tggaagatgc caggaagata  
6061 cttaacaggg aagtgagagg gccgcggcaa agccgttttt ccataggctc cgc<sup>ccccctg</sup>  
6121 acaagcatca cgaaatctga cgctcaa<sup>atc</sup> agtgggtggc aaaccgaca ggactata<sup>aaa</sup>  
6181 gataccaggc gtttcccct ggcggtccc tcgtcgcctc tcctgttctt gc<sup>ctttcgg</sup>t  
6241 ttaccggtgt cattccgtg ttatggccg gtttgtctca ttccacgct gacactcagt  
6301 tccgggtagg cagttcgtc caagctggac tgtatgcacg a<sup>ccccccgt</sup> tcagtcggac  
6361 cgtgcgcct tatccggtaa ctatcgtctt g<sup>ag</sup>tccaacc cggaaagaca tgcaaaagca

6421 ccactggcag cagccactgg taattgattt agaggagtta gtcttgaagt catgcgcogg  
6481 ttaaggctaa actgaaagga caagttttgg tgactgcgct cctccaagcc agttacctcg  
6541 gttcaaagag

#### Comments

ZKRS ORF: 1986–3350 (highlighted in pink)

PCR primer ZKRS-s: 2111–2134 (underlined yellow letters)

PCR primer ZKRS-as: 3174–3194 (complementary strand; underlined yellow letters)

tRNA<sup>pyl</sup><sub>cgc</sub>: 3771–3896 (complementary strand; highlighted in deep green. The anticodon region is highlighted in yellow–green)

tRNA<sup>pyl</sup><sub>ggc</sub>: 4152–4298 (complementary strand; highlighted in deep green. The anticodon region is highlighted in yellow–green)

*cat* ORF: 4810–5469 (complementary strand; highlighted in light blue)

p15A origin: 5831–192 (highlighted in gray)

**Figure S3.**

Nucleotide sequence of the substitute plasmid, pACYC184, used in the plasmid exchange experiment shown in Figure 2. The positions and sequences of the PCR primers specific for the substitute plasmids (Tet-s and Tet-as) used in Figure 2e are also shown.

1 GAATTCGGGA TGAGCATTCA TCAGGCGGGC AAGAATGTGA ATAAAGGCCG GATAAACTT  
61 GTGCTTATTT TTCTTTACGG TCTTTAAAAA GGCCGTAATA TCCAGCTGAA CGGTCTGGTT  
121 ATAGGTACAT TGAGCAACTG ACTGAAATGC CTCAAAATGT TCTTTACGAT GCCATTGGGA  
181 TATATCAACG GTGGTATATC CAGTGATTTT TTTCTCCATt ttagcttct tagctcctga  
241 aaatctcgat aactcaaaaa atacgcccgg tagtgatctt atttcattat ggtgaaagtt  
301 ggaacctctt acgtgccgat caacgtctca ttttcgcaa aagttggccc agggcttccc  
361 ggtatcaaca gggacaccag gatttattta ttctgcgaag tgatcttccg tcacaggat  
421 ttatttcggc caaagtgcgt cgggtgatgc tgccaactta ctgatttagt gtatgatggt  
481 gtttttgagg tgcctcagt gcttctgttt ctatcagctg tccctcctgt tcagctactg  
541 acggggtggt gcgtaacggc aaaagcaccc cgggacatca gcgctagcgg agtgtatact  
601 ggcttactat gttggcactg atgagggtgt cagtgaagtg cttcatgtgg caggagaaaa  
661 aaggctgcac cgtgcggtca gcagaatatg tgatacagga tatattccgc ttctcgcctc  
721 actgactcgc tacgctcggc cgttcgactg cggcgagcgg aatggctta cgaacggggc  
781 ggagatttcc tggaagatgc caggaagata cttaacaggg aagtgagagg gccgcggcaa  
841 agccgttttt ccataggctc cgccccctg acaagcatca cgaaatctga cgctcaaatc  
901 agtgggtggc aaacccgaca ggactataaa gataccaggc gtttccccct ggcggtctcc  
961 tctgctcgc tcctgttctt gcctttcggc ttaccgggtg cattccgctg ttatggccgc  
1021 gtttgtctca ttccacgcct gacactcagt tccgggtagg cagttcgcct caagctggac  
1081 tgtatgcacg aacccccctg tcagtcgcac cgctgcgcct tatccggtaa ctatcgtott  
1141 gagtccaacc cggaagaca tgcaaaagca ccactggcag cagccactgg taattgattt  
1201 agaggagtta gtcttgaagt catgcgcggg ttaaggctaa actgaaagga caagttttgg  
1261 tgactgcgct cctccaagcc agttacctg gttcaaagag ttggtagctc agagaacctt  
1321 cgaaaaaccg ccctgcaagg cggttttttc gttttcagag caagagatta cgcgagacc  
1381 aaaacgatct caagaagatc atcttattaa tcagataaaa tttttctaga tticagtga  
1441 atttatctct tcaaatgtag cacctgaagt cagcccata cgatataagt tgtaattctc  
1501 atgtttgaca gcttatcatc gataagcttt aatgcggtag tttatcacag ttaaattgct  
1561 aacgcagtca ggcaccgtgt ATGAAATCTA ACAATGCGCT CATCGTCATC CTCGGCACCG  
1621 TCACCCTGGA TGCTGTAGGC ATAGGCTTGG TTATGCCGGT ACTGCCGGGC CTCTTGCGGG  
1681 ATATCGTCCA TTCCGACAGC ATCGCCAGTC ACTATGGCGT GCTGCTAGCG CTATATGCGT  
1741 TGATGCAATT TCTATGCGCA CCCGTTCTCG GAGCACTGTC CGACCGCTTT GGCCGCGGCC  
1801 CAGTCTGCT CGCTTCCTA CTGGAGCCA CTATCGACTA CGCGATCATG GCGACCACAC  
1861 CGGTCCTGTG GATCCTCTAC GCCGACGCA TCGTGGCCGG CATCACGGGC GCCACAGGTG  
1921 CGGTTGCTGG CGCCTATATC GCCGACATCA CCGATGGGGA AGATCGGGCT CGCCACTTCG  
1981 GGCTCATGAG CGCTTGTTT GCGGTGGGTA TGGTGGCAGG CCCCCTGGCC GGGGGACTGT  
2041 TGGGCGCCAT CTCCTTGCAT GCACCATTC TTGCGGCGGC GGTGCTCAAC GGCCTCAACC  
2101 TACTACTGGG CTGCTTCCTA ATGCAGGAGT CGCATAAGGG AGAGCGTCGA CCGATGCCCT

2161 TGAGAGCCTT CAACCCAGTC AGTCCTTCC GGTGGGCGCG GGGCATGACT ATCGTCGCCG  
2221 CACTTATGAC TGTCTTCTT **ATCATGCAAC TCGTAGGACA** GGTGCCGGCA GCGCTCTGGG  
2281 TCATTTTCGG CGAGGACCGC TTTCGCTGGA GCGCGACGAT GATCGGCCTG TCGCTTGCGG  
2341 TATTGGAAT CTTGCACGCC CTCGCTCAAG CCTTCGTCAC TGGTCCCGCC ACCAAACGTT  
2401 TCGGCGAGAA GCAGGCCATT ATCGCCGGCA TGGCGGCCGA CGCGCTGGGC TACGTCTTGC  
2461 TGGCGTTGCG GACGCGAGGC TGGATGGCT TCCCATTAT GATTCTTCTC GCTTCCGGCG  
2521 GCATCGGGAT GCCCGCGTTG CAGGCCATGC TGTCCAGGCA GGTAGATGAC GACCATCAGG  
2581 GACAGCTTCA AGGATCGCTC GCGGCTCTTA CCAGCCTAAC TTCGATCACT GGACCGCTGA  
2641 TCGTCACGGC GATTATGCC GCCTCGGCGA GCACATGGAA CGGGTTGGCA TGGATTGTAG  
2701 GCGCCGCCCT ATACCTTGTG TGCCTCCCGG CGTTGCGTCG CGGTGCATGG AGCCGGGCCA  
2761 **CCTCGACCTG** Aatggaagcc ggcggcacct cgctaacgga ttcaccactc caagaattgg  
2821 agccaatcaa ttcttgcgga gaactgtgaa tgcgcaaacc aacccttggc agaacatato  
2881 catcgctcc gccatctcca gcagccgcac gcggcgcatc tcgggcagcg ttgggtcctg  
2941 gccacgggtg cgcatgatcg tgctcctgtc gttgaggacc cggctaggct ggcggggttg  
3001 ccttactggt tagcagaatg aatcacccgat acgcgagcga acgtgaagcg actgctgctg  
3061 caaaacgtct gcgaacctgag caacaacatg aatggtcttc ggtttcctg ttctgtaaag  
3121 tctggaacg cggaagtccc ctacgtgctg ctgaagttgc ccgcaacaga gagtggaacc  
3181 aaccggtgat accacgatac tatgactgag agtcaacgcc atgagcggcc tcatttotta  
3241 ttctgagtta caacagtccg caccgtgtc cggtagctcc ttccggtggg cgcggggcoat  
3301 gactatcgtc gccgcactta tgactgtctt ctttatcatg caactcgtag gacaggtgcc  
3361 ggccagcgccc aacagtcccc cggccacggg gcctgccacc ataccacgc cgaaacaagc  
3421 gccctgcacc attatgttcc ggatctgcat cgcaggatgc tgctggctac cctgtggaac  
3481 acctacatct gtattaacga agcgotaacc gtttttatca ggctctggga ggcagaataa  
3541 atgatcatat cgtcaattat tacctccacg gggagagcct gagcaaactg goctcaggca  
3601 tttgagaagc acacggtcac actgcttccg gtagtcaata aaccggtaaa ccagcaatag  
3661 acataagcgg ctatttaacg accctgccct gaaccgacga ccgggtcgaa tttgctttcg  
3721 aatttctgcc attcatccgc ttattatcac ttattcaggc gtagcaccag gogtttaagg  
3781 gcaccaataa ctgccttaaa aaaa**TTACGC** CCCGCCCTGC CACTCATCGC AGTACTGTTG  
3841 **TAATTCATTA AGCATTCTGC CGACATGGAA GCCATCACAG ACGGCATGAT GAACCTGAAT**  
3901 **CGCCAGCGGC ATCAGCACCT TGTCGCCTTG CGTATAATAT TTGCCCATGG TGAAAACGGG**  
3961 **GGCGAAGAAG TTGTCCATAT TGGCCACGTT TAAATCAAAA CTGGTGAAAC TCACCCAGGG**  
4021 **ATTGGCTGAG ACGAAAAACA TATTCTCAAT AAACCCTTTA GGGAAATAGG CCAGGTTTTC**  
4081 **ACCGTAACAC GCCACATCTT GCGAATATAT GTGTAGAAAC TGCCGGAAAT CGTCGTGCTA**  
4141 **TTCACTCCAG AGCGATGAAA ACGTTTCAGT TTGCTCATGG AAAACGGTGT AACAAGGGTG**  
4201 **AACACTATCC CATATCACCA GCTCACCGTC TTTCAATGCC ATACG**

Comments

p15A origin: 581-1493 (highlighted in gray)

Tetracycline resistance gene ORF: 1581-2771 (highlighted in yellow-green)

PCR primer Tet-s: 1805-1823 (underlined red letters)

PCR primer Tet-as: 2241-2262 (complementary strand; underlined red letters)

*cat* ORF: 3805-219 (complementary strand; highlighted in light blue)
